# Supplementary material for: Sensitivity of the amide I band to matrix manipulation in bone: a Raman micro-spectroscopy and spatially offset Raman spectroscopy study
Source: Royal Society of Chemistry journal article supplement (doi:10.1039/d3an00527e), 2023-01-01
Supplement: d3an00527e1.pdf [file d3an00527e1.pdf]

## **Sensitivity of Amide I band to matrix manipulation: a Raman micro-spectroscopy and Spatially Offset Raman Spectroscopy study**

Rafay Ahmed, Mustafa Unal\*, Rekha Gautam, Sasidhar Uppuganti, Shrey Desari,

Anita Mahadevan-Jansen, and Jeffry S. Nyman

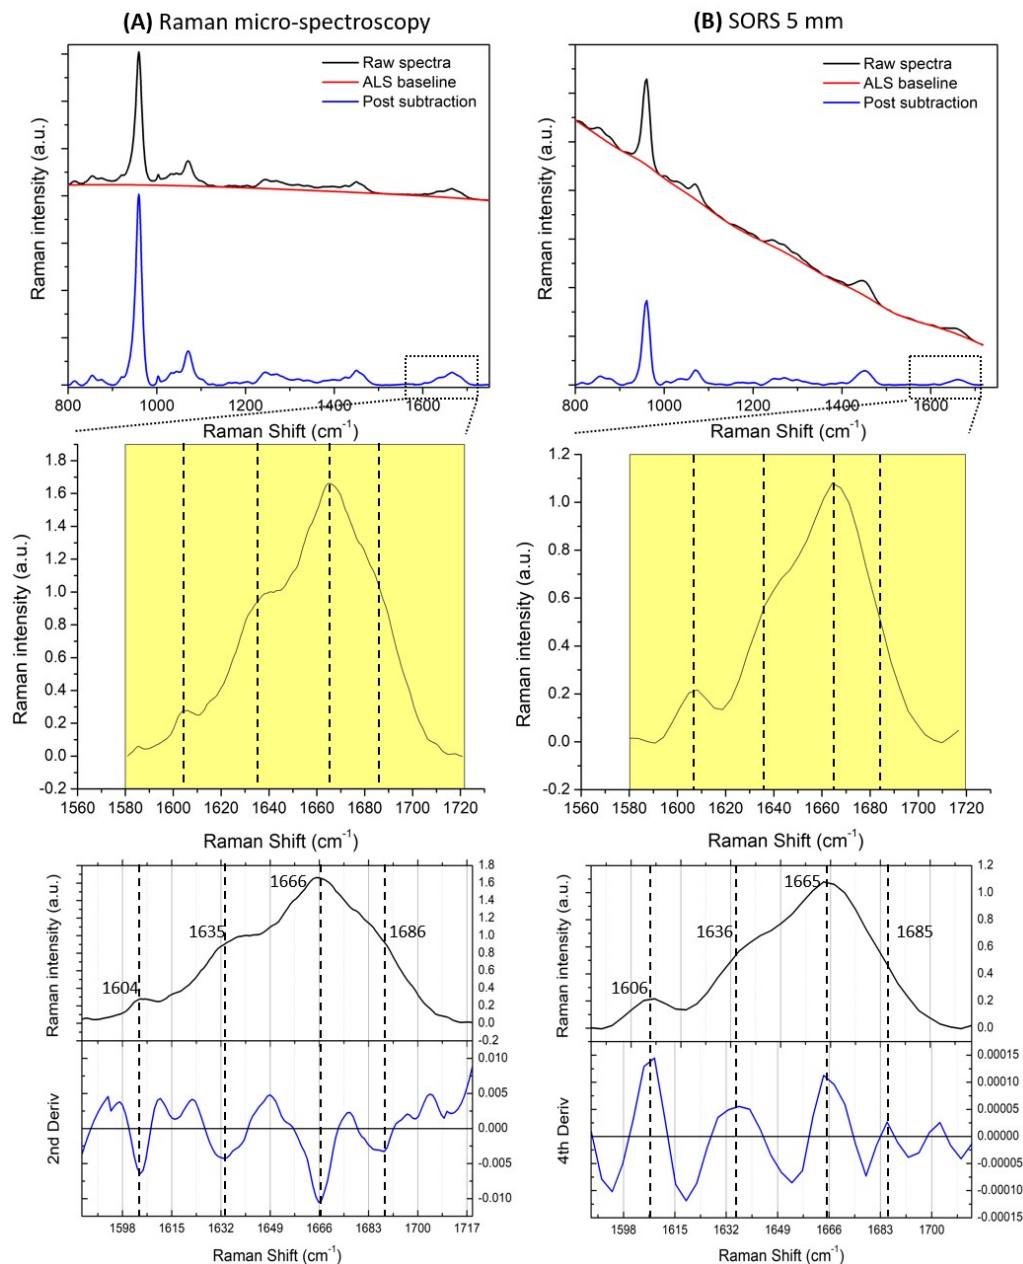

**Fig. S1. Representative Raman spectral processing.** Data acquired using conventional Raman micro-spectroscopy (A) and 5 mm offset SORS (B) are processed for background subtraction using asymmetric least squares (ALS) method. ALS parameters “ $\lambda$ ” and “ $p$ ” were optimized for  $\mu$ RS ( $\lambda=100000$ ,  $p=0.001$ ) and SORS ( $\lambda=4$ ,  $p=1e^{-4}$ ).  $\lambda$  fits the baseline to the data and  $p$  defines the asymmetry of positive versus negative residuals. Amide I band in the region 1580-1720 cm<sup>-1</sup> is selected (zoomed down) to apply the 2nd derivative (A) and 4<sup>th</sup> derivative (B) to find the hidden peaks within the band.

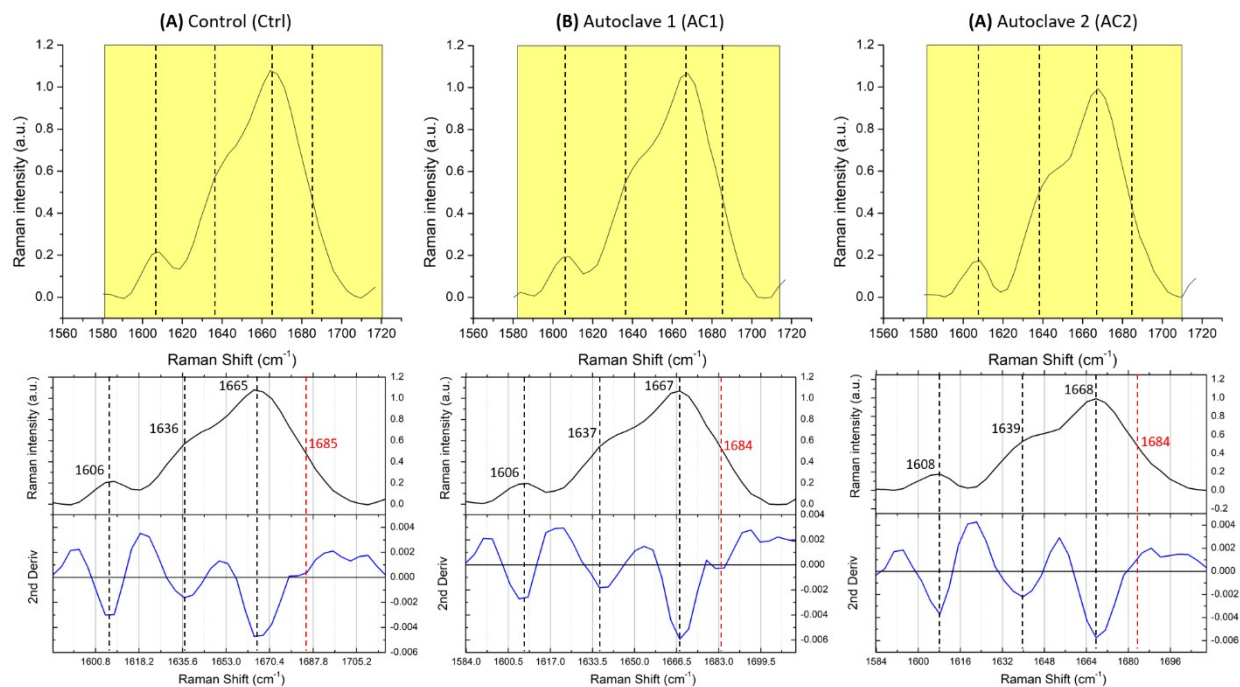

**Fig. S2. Amide I sub-peaks using 2nd derivative for SORS acquired data.** Sub-peaks identified using 2<sup>nd</sup> derivative approach for the SORS acquired data (5 mm offset is represented here) failed to identify the 4<sup>th</sup> sub-peak regardless of the sample condition i.e., control (A) or autoclaved AC1 (B) and AC2 (C).

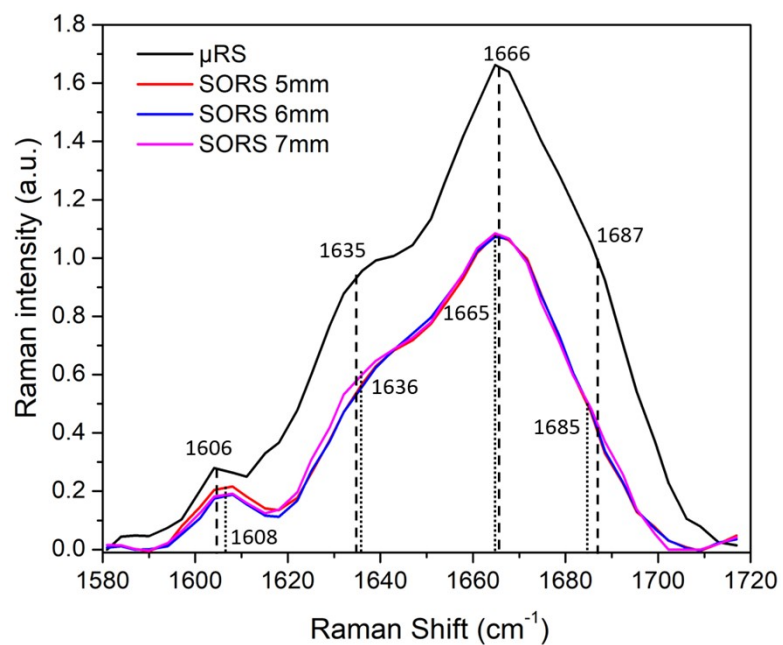

**Fig. S3. Amide I band comparison ( $\mu$ RS vs. SORS).** Raman spectra were pre-processed for background subtraction and Amide I band is separately plotted here for comparing the intensity and band shape when acquired using Raman micro-spectroscopy and SORS. Intensity of RS is higher compared to SORS irrespective of offset rings. The slight differences between peak positions are labelled. Average peak positions are used for SORS.

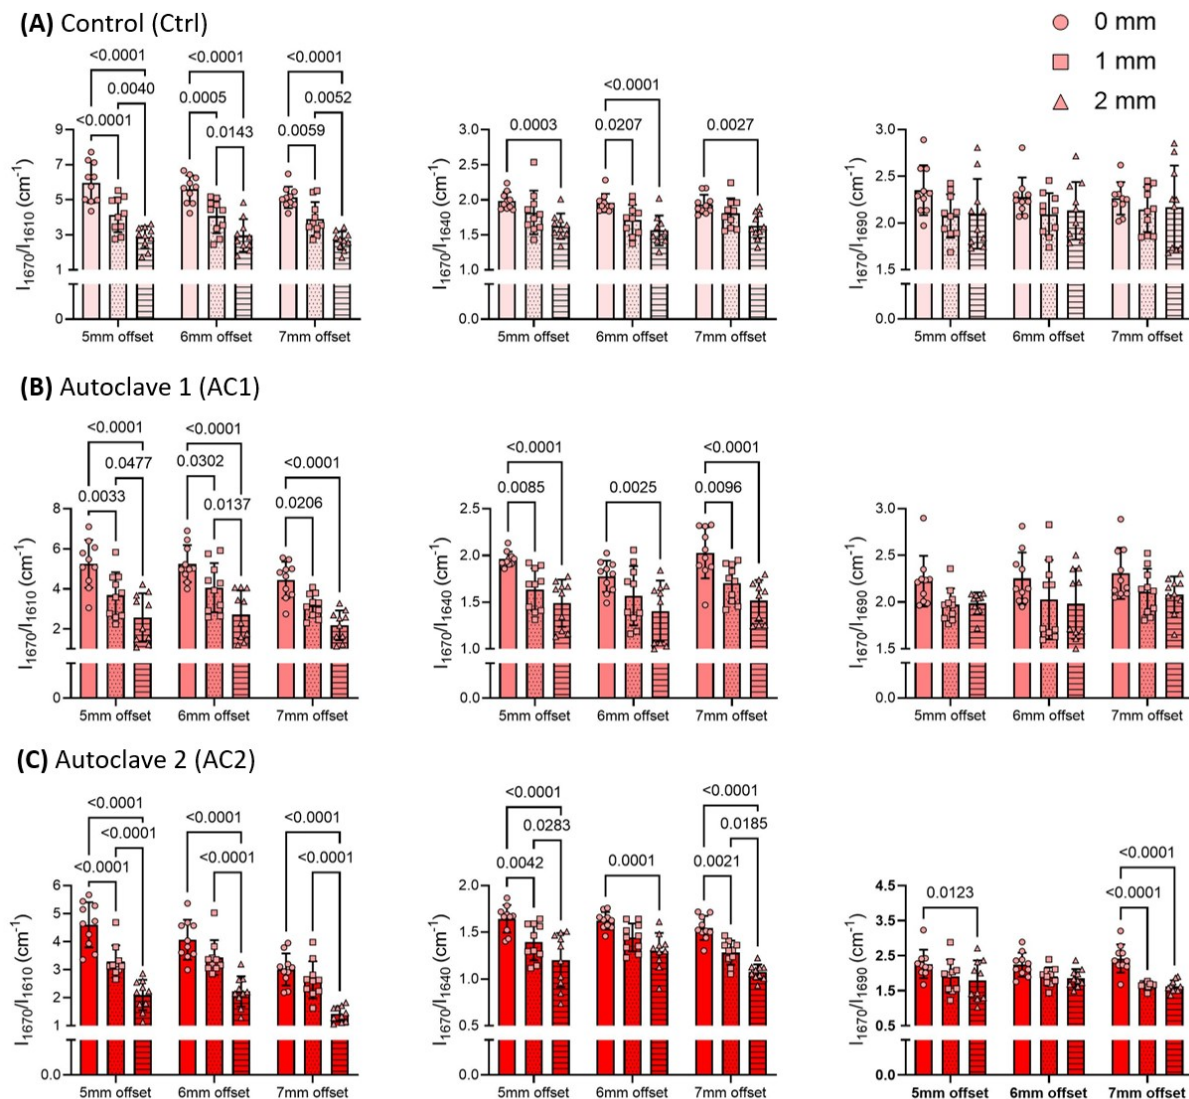

**Fig. S4. Raman signal attenuation resulted in dropping Amide I sub-peak ratios through layers.** Regardless of the bone condition as Ctrl (A), AC1 (B), AC2 (C), sub-peak ratios significantly dropped when compared between 0 mm thickness (direct bone), 1 mm and 2 mm layers.

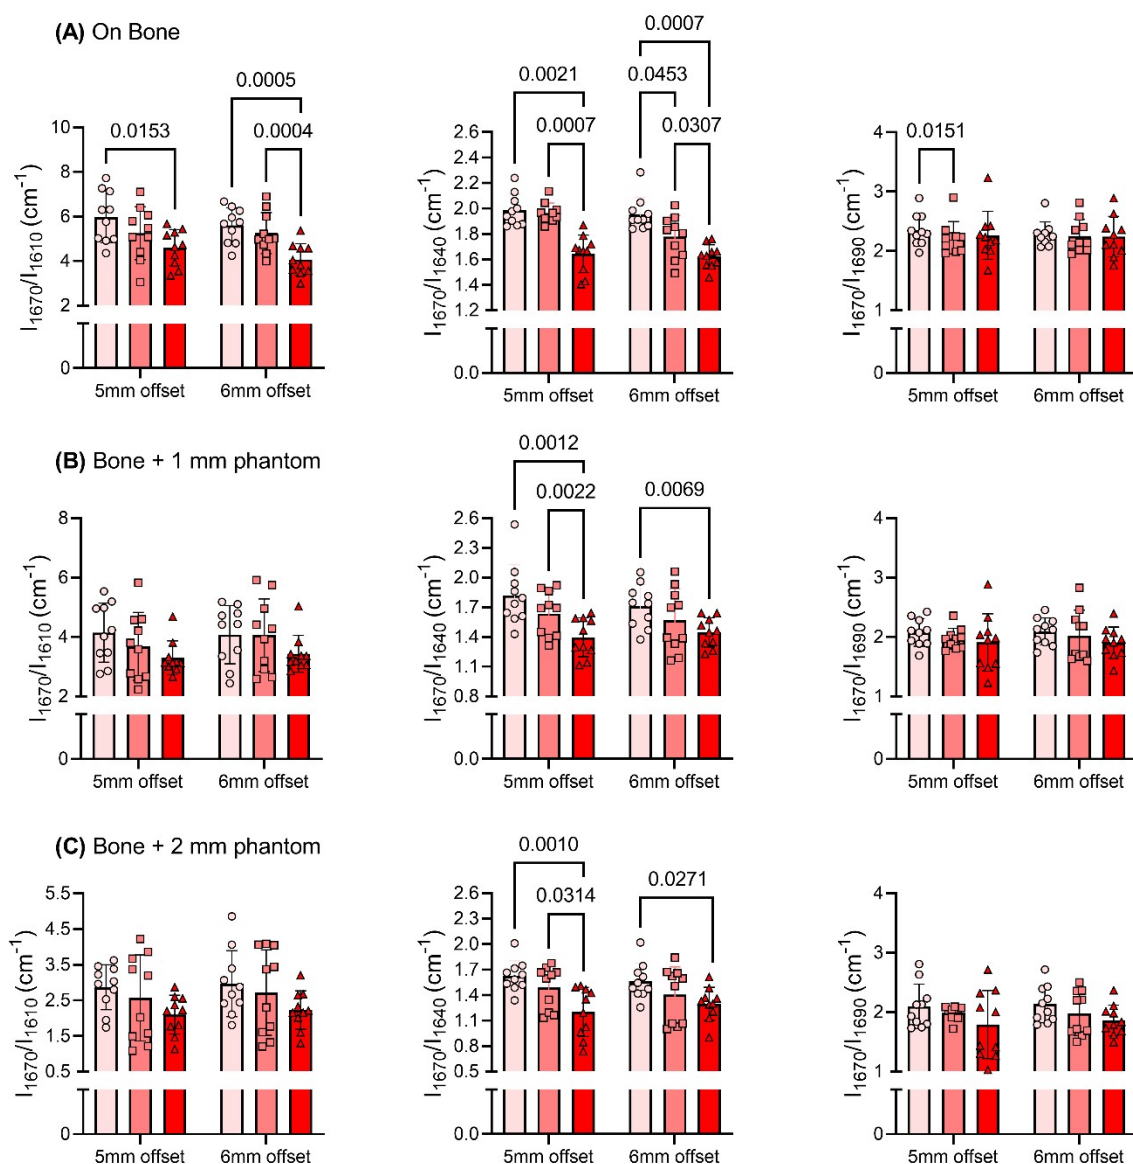

**Fig. S5. Sensitivity of SORS to autoclaving when spectra were acquired through tissue phantom layers with a thickness of 2 mm.** 4 sub-peak ratios detected through 4th derivative test are plotted against autoclave treatment for 5 mm and 6 mm offset.  $\sim I_{1670}/I_{1640}$  ratio was decreased irrespective of the layers and offsets. For other ratios ( $\sim I_{1670}/I_{1610}$ ,  $\sim I_{1670}/I_{1690}$ ) both 5 mm and 6 mm offset lost the sensitivity with layer thickness of 1 mm and 2 mm.
